# Supplementary material for: Smokefree legislation effects on respiratory and sensory disorders: A systematic review and meta-analysis
Source: PubMed Central journal article supplement (PMC5536320; doi:10.1371/journal.pone.0181035), 2017-07-31
Supplement: pone.0181035.s004.pdf [file pone.0181035.s004.pdf]

**Table S3: Descriptive characteristics of the 50 articles obtained for smokefree legislation effects on respiratory disorders (1995-2015)**

| Variable                     | Category                                        | N  | % of the papers included |
|------------------------------|-------------------------------------------------|----|--------------------------|
| Continent                    | Europe                                          | 24 | 48                       |
|                              | America                                         | 21 | 42                       |
|                              | Asia                                            | 5  | 10                       |
| Country                      | United States                                   | 16 | 32                       |
|                              | Ireland                                         | 6  | 12                       |
|                              | Switzerland                                     | 4  | 8                        |
|                              | China                                           | 3  | 6                        |
|                              | Scotland                                        | 3  | 6                        |
|                              | England                                         | 2  | 4                        |
|                              | Canada                                          | 2  | 4                        |
|                              | Norway                                          | 2  | 4                        |
|                              | Portugal                                        | 2  | 4                        |
|                              | Sweden                                          | 2  | 4                        |
|                              | Argentina                                       | 1  | 2                        |
|                              | Finland                                         | 1  | 2                        |
|                              | Korea Rep                                       | 1  | 2                        |
|                              | Kyrgyzstan                                      | 1  | 2                        |
|                              | Scotland & England                              | 1  | 2                        |
|                              | Spain                                           | 1  | 2                        |
|                              | Turkey                                          | 1  | 2                        |
| Uruguay                      | 1                                               | 2  |                          |
| Setting                      | Hospitality                                     | 22 | 44                       |
|                              | City/region                                     | 22 | 44                       |
|                              | Different workplaces                            | 3  | 6                        |
|                              | Schools                                         | 2  | 4                        |
|                              | Prisons                                         | 1  | 2                        |
| Type of legislation*         | Total comprehensive                             | 33 | 66                       |
|                              | Partial comprehensive                           | 12 | 24                       |
|                              | Different types of SFL                          | 3  | 6                        |
|                              | Labor                                           | 2  | 4                        |
| Study design                 | Before-after non-experimental design            | 27 | 54                       |
|                              | Non-experimental design: time series            | 10 | 20                       |
|                              | Quasi-experimental design: time series          | 6  | 12                       |
|                              | Before-after quasi-experimental design          | 5  | 10                       |
|                              | Other designs                                   | 2  | 4                        |
| Participants                 | Specifically adult workers                      | 25 | 50                       |
|                              | Adults + children together (general population) | 12 | 24                       |
|                              | Adults                                          | 8  | 16                       |
|                              | Children                                        | 4  | 8                        |
|                              | Vulnerable population (prisoners)               | 1  | 2                        |
| Data source/data information | Hospital registers                              | 19 | 38                       |
|                              | Self-reported questionnaires                    | 15 | 30                       |
|                              | No self-reported questionnaire                  | 4  | 8                        |
|                              | Self-reported questionnaires + Spirometry       | 4  | 8                        |
|                              | Mortality data                                  | 3  | 6                        |
|                              | Spirometry                                      | 2  | 4                        |
|                              | No self-reported questionnaire + Spirometry     | 2  | 4                        |
|                              | Hospital registers + Mortality data             | 1  | 2                        |

| Variable                           | Category                                             | N  | % of the papers included |
|------------------------------------|------------------------------------------------------|----|--------------------------|
| Study period before the SFL        | 0-1 month                                            | 11 | 22                       |
|                                    | 2-6 months                                           | 8  | 16                       |
|                                    | 7-12 months                                          | 1  | 2                        |
|                                    | >1-2 years                                           | 7  | 14                       |
|                                    | >2-3 years                                           | 4  | 8                        |
|                                    | >3 years                                             | 13 | 26                       |
|                                    | Not specified                                        | 6  | 12                       |
| Study period after the SFL         | 0-1 month                                            | 4  | 8                        |
|                                    | 2-6 months                                           | 6  | 12                       |
|                                    | 7-12 months                                          | 13 | 26                       |
|                                    | >1-2 years                                           | 11 | 22                       |
|                                    | >2-3 years                                           | 4  | 8                        |
|                                    | >3 years                                             | 10 | 20                       |
|                                    | Not specified                                        | 2  | 4                        |
| Respiratory and sensory outcomes † | Respiratory symptoms                                 | 26 | 52                       |
|                                    | Sensory symptoms                                     | 19 | 38                       |
|                                    | Hospital admissions for asthma                       | 17 | 34                       |
|                                    | Hospital admissions for COPD                         | 9  | 18                       |
|                                    | Spirometric parameters                               | 8  | 16                       |
|                                    | Hospital admissions for other pulmonary diseases     | 4  | 8                        |
|                                    | Other mortality respiratory diseases                 | 3  | 6                        |
|                                    | Hospital admissions for overall respiratory diseases | 3  | 6                        |
|                                    | COPD mortality                                       | 2  | 4                        |
|                                    | Persistent ear infection                             | 1  | 2                        |
| Declared Conflict of Interest      | Yes                                                  | 31 | 62                       |
|                                    | No                                                   | 19 | 38                       |
| Summary Risk of Bias               | Low                                                  | 23 | 46                       |
|                                    | Moderate                                             | 19 | 38                       |
|                                    | High                                                 | 8  | 16                       |

\* We classified comprehensive smoke-free legislations as those that banned smoking in virtually all indoor workplaces and public areas, including bars, restaurants and public transport; and partial as that which comprises fewer locations than those described[6]

All the percentages of variables add up to 100% except: † There are papers with more than one outcome. COPD=chronic obstructive pulmonary disease.

#### Reference

- Hyland A, Barnoya J, Corral JE (2012) Smoke-free air policies: past, present and future. *Tob Control* 21:154–161.
