# Supplementary material for: Smokefree legislation effects on respiratory and sensory disorders: A systematic review and meta-analysis
Source: PubMed Central journal article supplement (PMC5536320; doi:10.1371/journal.pone.0181035), 2017-07-31
Supplement: pone.0181035.s005.pdf [file pone.0181035.s005.pdf]

**S4 Table. Sensitivity analysis by omitting one or two until I2 dropped below the intended threshold 50% and range.**

| Subgroup                                                           | N. of studies | RD <sup>a</sup> , MD <sup>b</sup> , RR <sup>c</sup> (95% CI) | I2 (%) | P value I2 | Range          |
|--------------------------------------------------------------------|---------------|--------------------------------------------------------------|--------|------------|----------------|
| Any respiratory symptoms in comprehensive SFL setting <sup>a</sup> |               |                                                              |        |            |                |
| Total                                                              | 10            | -0.19 (-0.26, -0.12)                                         | 70     | 0.001      | (-0.18, 0.21)  |
| Omitting two [76]                                                  | 9             | -0.21 (-0.27, -0.15)                                         | 41     | 0.10       |                |
| Any respiratory symptoms in partial SFL setting <sup>a</sup>       |               |                                                              |        |            |                |
| Total                                                              | 4             | -0.20 (-0.31, -0.08)                                         | 54     | 0.09       | (-0.14, -0.25) |
| Omitting one [56]                                                  | 3             | -0.14 (-0.19, -0.10)                                         | 0      | 0.45       |                |
| Any sensory symptoms in comprehensive SFL setting <sup>a</sup>     |               |                                                              |        |            |                |
| Total                                                              | 9             | -0.34 (-0.46, -0.22)                                         | 86     | <0.001     | (-0.31, -0.37) |
| FEV1 in comprehensive SFL setting <sup>b</sup>                     |               |                                                              |        |            |                |
| Total                                                              | 3             | 0.10 (-0.04, 0.24)                                           | 87     | <0.001     | (-0.04, 0.13)  |
| Asthma admissions in general population <sup>c</sup>               |               |                                                              |        |            |                |
| Total                                                              | 6             | 0.87 (0.81, 0.93)                                            | 78     | <0.001     | (0.85, 0.89)   |
| Asthma admissions in children <sup>c</sup>                         |               |                                                              |        |            |                |
| Total                                                              | 5             | 0.85 (0.79, 0.91)                                            | 87     | <0.001     | (0.82, 0.86)   |
| Omitting one [59]                                                  | 4             | 0.82 (0.79, 0.84)                                            | 0      | 0.77       |                |
| Asthma admissions in adults <sup>c</sup>                           |               |                                                              |        |            |                |
| Total                                                              | 7             | 0.85 (0.73, 0.99)                                            | 65     | 0.009      | (0.80, 0.90)   |
| Omitting two [42] [48]                                             | 5             | 0.77 (0.70, 0.85)                                            | 31     | 0.22       |                |
| COPD admissions <sup>c</sup>                                       |               |                                                              |        |            |                |
| Total                                                              | 6             | 0.80 (0.63, 1.00)                                            | 96     | <0.001     | (0.73, 0.85)   |

**Abbreviations: CI, confidence interval; COPD, chronic obstructive pulmonary disease; FEV1, forced expired volume in one second ; MD, mean difference; N, number; RD, risk difference; RR, risk ratio, SFL, smokefree legislation.**

**References:**

42. Gaudreau K, Sanford CJ, Cheverie C, McClure C (2013) The Effect of a Smoking Ban on Hospitalization Rates for Cardiovascular and Respiratory Conditions in Prince Edward Island, Canada. *PLoS ONE* 8: e56102.
48. Humair J-P, Garin N, Gerstel E, Carballo S, Carballo D, Keller P-F, et al. (2014) Acute Respiratory and Cardiovascular Admissions after a Public Smoking Ban in Geneva, Switzerland. *PLoS ONE* 9(3): e90417. doi:10.1371/journal.pone.0090417.
56. Madureira J, Mendes A, Almeida S, Teixeira JP (2012) Positive impact of the Portuguese smoking law on respiratory health of restaurant workers. *J Toxicol Environ Heal - Part A Curr Issues* 75:776–787.
59. Millett C, Lee JT, Lavery AA, Glantz SA, Majeed A (2013) Hospital admissions for childhood asthma after smoke-free legislation in England. *Pediatrics* 131: e495–501.
76. Eagan TML, Hetland J, Aarø LE (2006) Decline in respiratory symptoms in service workers five months after a public smoking ban. *Tob Control* 15(3):242–246.
