# Supplementary material for: Smokefree legislation effects on respiratory and sensory disorders: A systematic review and meta-analysis
Source: PubMed Central journal article supplement (PMC5536320; doi:10.1371/journal.pone.0181035), 2017-07-31
Supplement: pone.0181035.s006.pdf [file pone.0181035.s006.pdf]

**S5 Table. Subgroup analysis by study design, risk of bias and follow-up time among studies relating any respiratory and sensory symptoms.**

| Subgroup                                              | Number of studies | RD (95% CI)          | I <sup>2</sup> (%) | P value I <sup>2</sup> |
|-------------------------------------------------------|-------------------|----------------------|--------------------|------------------------|
| Any respiratory symptoms in comprehensive SFL setting |                   |                      |                    |                        |
| Total                                                 | 10                | -0.19 (-0.26, -0.12) | 70                 | 0.001                  |
| Type of study design                                  |                   |                      |                    |                        |
| Non experimental                                      | 9                 | -0.20(-0.28, -0.12)  | 73                 | <0.001                 |
| Quasi-experimental                                    | 1                 | -0.17 (-0.28, -0.05) | 90                 | 0.005                  |
| Risk of bias                                          |                   |                      |                    |                        |
| Low                                                   | 6                 | -0.20 (-0.30, -0.10) | 80                 | <0.001                 |
| Moderate                                              | 2                 | -0.23 (-.34, -0.11)  | 0                  | 0.47                   |
| High                                                  | 2                 | -0.16 (-0.26, -0.06) | 0                  | 0.33                   |
| Follow-up time                                        |                   |                      |                    |                        |
| <12 months                                            | 4                 | -0.25 (-0.42, -0.07) | 88                 | <0.001                 |
| ≥12 months                                            | 6                 | -0.16 (-0.21, -0.11) | 0                  | 0.64                   |
| Any respiratory symptoms in partial SFL setting       |                   |                      |                    |                        |
| Total                                                 | 4                 | -0.20 (-0.31, -0.08) | 54                 | 0.09                   |
| Type of study design                                  |                   |                      |                    |                        |
| Non experimental                                      | 3                 | -0.19(-0.32, -0.05)  | 63                 | 0.007                  |
| Quasi-experimental                                    | 1                 | -0.28 (-0.51, -0.05) |                    |                        |
| Risk of bias                                          |                   |                      |                    |                        |
| Low                                                   | 1                 | -0.14 (-0.19, -0.09) |                    |                        |
| Moderate                                              | 2                 | -0.34 (-.50, -0.18)  | 0                  | 0.51                   |
| High                                                  | 1                 | -0.10 (-0.28, -0.08) |                    |                        |
| Follow-up time                                        |                   |                      |                    |                        |
| <12 months                                            | 1                 | -0.10 (-0.28, 0.08)  |                    |                        |
| ≥12 months                                            | 3                 | -0.24 (-0.41, -0.08) | 68                 | 0.05                   |
| Any sensory symptoms in comprehensive SFL setting     |                   |                      |                    |                        |
| Total                                                 | 9                 | -0.34 (-0.46, -0.22) | 86                 | <0.001                 |
| Type of study design                                  |                   |                      |                    |                        |
| Non experimental                                      | 8                 | -0.36(-0.49, -0.22)  | 87                 | <0.001                 |
| Quasi-experimental                                    | 1                 | -0.22 (-0.34, -0.11) |                    |                        |
| Risk of bias                                          |                   |                      |                    |                        |
| Low                                                   | 5                 | -0.36 (-0.54, -0.18) | 91                 | <0.001                 |
| Moderate                                              | 2                 | -0.43 (-.57, -0.29)  | 36                 | 0.21                   |
| High                                                  | 2                 | -0.18 (-0.28, -0.08) | 0                  | 0.48                   |
| Follow-up time                                        |                   |                      |                    |                        |
| <12 months                                            | 3                 | -0.48 (-0.60, -0.36) | 52                 | 0.12                   |
| ≥12 months                                            | 6                 | -0.27 (-0.39, -0.15) | 81                 | <0.001                 |

**Abbreviations: CI, confidence interval; RD, risk difference; SFL, smokefree legislation.**
