# Supplementary material for: Smokefree legislation effects on respiratory and sensory disorders: A systematic review and meta-analysis
Source: PubMed Central journal article supplement (PMC5536320; doi:10.1371/journal.pone.0181035), 2017-07-31
Supplement: pone.0181035.s007.pdf [file pone.0181035.s007.pdf]

**S7 Table. Subgroup analysis by study design, risk of bias and follow-up time among studies relating asthma and COPD admissions in comprehensive SFL setting.**

| Subgroup                                | Number of studies | RD (95% CI)       | I2 (%) | P value I2 |
|-----------------------------------------|-------------------|-------------------|--------|------------|
| Asthma admissions in general population |                   |                   |        |            |
| Total                                   | 6                 | 0.87 (0.81, 0.93) | 78     | <0.001     |
| Type of study design                    |                   |                   |        |            |
| Non experimental                        | 3                 | 0.84(0.76, 0.93)  | 79     | 0.008      |
| Quasi-experimental                      | 3                 | 0.90 (0.78, 1.03) | 80     | 0.007      |
| Risk of bias                            |                   |                   |        |            |
| Low                                     | 2                 | 0.89 (0.76, 1.03) | 81     | 0.02       |
| Moderate                                | 3                 | 0.82 (0.73, 0.92) | 84     | 0.002      |
| High                                    | 1                 | 0.98 (0.85, 1.13) |        |            |
| Follow-up time                          |                   |                   |        |            |
| <24 months                              | 2                 | 0.87 (0.68, 1.10) | 84     | 0.01       |
| ≥24 months                              | 4                 | 0.87 (0.81, 0.94) | 80     | 0.002      |
| Asthma admissions in children           |                   |                   |        |            |
| Total                                   | 5                 | 0.85 (0.79, 0.91) | 87     | <0.001     |
| Type of study design                    |                   |                   |        |            |
| Non experimental                        | 4                 | 0.85(0.79, 0.91)  | 90     | <0.001     |
| Quasi-experimental                      | 1                 | 1.11 (0.63, 1.96) |        |            |
| Risk of bias                            |                   |                   |        |            |
| Low                                     | 4                 | 0.85 (0.79, 0.92) | 90     | <0.001     |
| Moderate                                | 1                 | 0.82 (0.71, 0.95) |        |            |
| Asthma admissions in adults             |                   |                   |        |            |
| Total                                   | 7                 | 0.85 (0.73, 0.99) | 65     | 0.009      |
| Type of study design                    |                   |                   |        |            |
| Non experimental                        | 6                 | 0.80(0.71, 0.92)  | 54     | 0.005      |
| Quasi-experimental                      | 1                 | 1.48 (0.90, 2.43) |        |            |
| Risk of bias                            |                   |                   |        |            |
| Low                                     | 3                 | 0.95 (0.74, 1.22) | 57     | 0.10       |
| Moderate                                | 4                 | 0.79 (0.63, 0.98) | 65     | 0.04       |
| Follow-up time                          |                   |                   |        |            |
| <24 months                              | 1                 | 1.17 (0.82, 1.76) |        |            |
| ≥24 months                              | 6                 | 0.81 (0.70, 0.93) | 59     | 0.03       |
| COPD admissions                         |                   |                   |        |            |
| Total                                   | 6                 | 0.80 (0.63, 1.00) | 96     | <0.001     |
| Type of study design                    |                   |                   |        |            |
| Non experimental                        | 4                 | 0.78(0.56, 1.09)  | 97     | <0.001     |
| Quasi-experimental                      | 2                 | 0.83 (0.74, 0.94) | 40     | 0.20       |
| Risk of bias                            |                   |                   |        |            |
| Low                                     | 2                 | 0.84 (0.73, 0.98) | 61     | 0.11       |
| Moderate                                | 3                 | 0.74 (0.47, 1.16) | 96     | <0.001     |
| High                                    | 1                 | 0.88 (0.78, 0.99) |        |            |
| Follow-up time                          |                   |                   |        |            |
| <24 months                              | 2                 | 0.61 (0.59, 0.63) | 0      | 0.35       |
| ≥24 months                              | 4                 | 0.92 (0.79, 1.08) | 80     | 0.002      |

**Abbreviations: COPD, chronic obstructive pulmonary disease; CI, confidence interval; RD, risk difference; SFL, smokefree legislation.**
