# Supplementary material for: Smokefree legislation effects on respiratory and sensory disorders: A systematic review and meta-analysis
Source: PLOS journal article supplement (doi:10.1371/journal.pone.0181035), 2017-07-31
Supplement: S8 (10.1371/journal.pone.0181035.s008) [file journal.pone.0181035.s008]

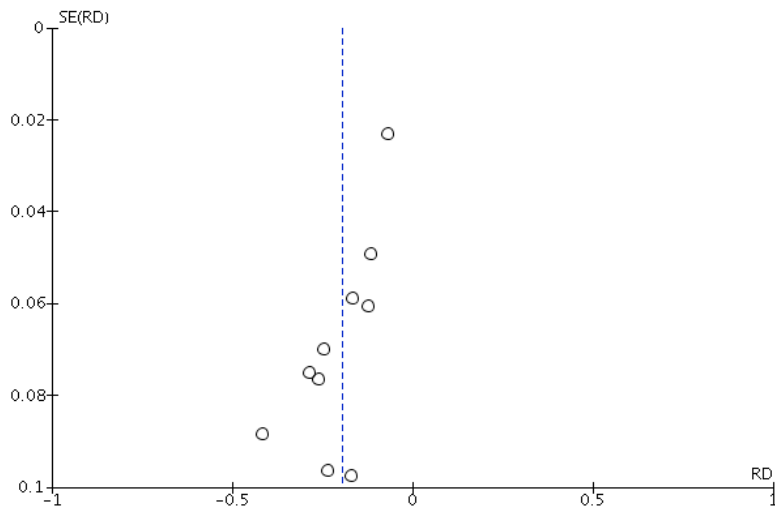

**S6 Fig. Funnel plot of any respiratory symptom in comprehensive smokefree legislation setting. Publication bias**
